# Supplementary material for: Borate ester endcapped fluorescent hyperbranched conjugated polymer for trace peroxide explosive vapor detection
Source: Royal Society of Chemistry journal article supplement (doi:10.1039/c5ra02472b), 2015-01-01
Supplement: c5ra02472b1.pdf [file c5ra02472b1.pdf]

Supporting Information for

**Borate Ester Endcapped Fluorescent Hyperbranched  
Conjugated Polymer for Trace Peroxide Explosive Vapor  
Detection**

Lei Chen<sup>a,b</sup>, Yixun Gao<sup>a,b</sup>, Yanyan Fu<sup>a</sup>, Defeng Zhu<sup>a</sup>, Qingguo He<sup>a</sup>\*, Huimin  
Cao<sup>a</sup> and Jiagong Cheng\*

Figures and Tables

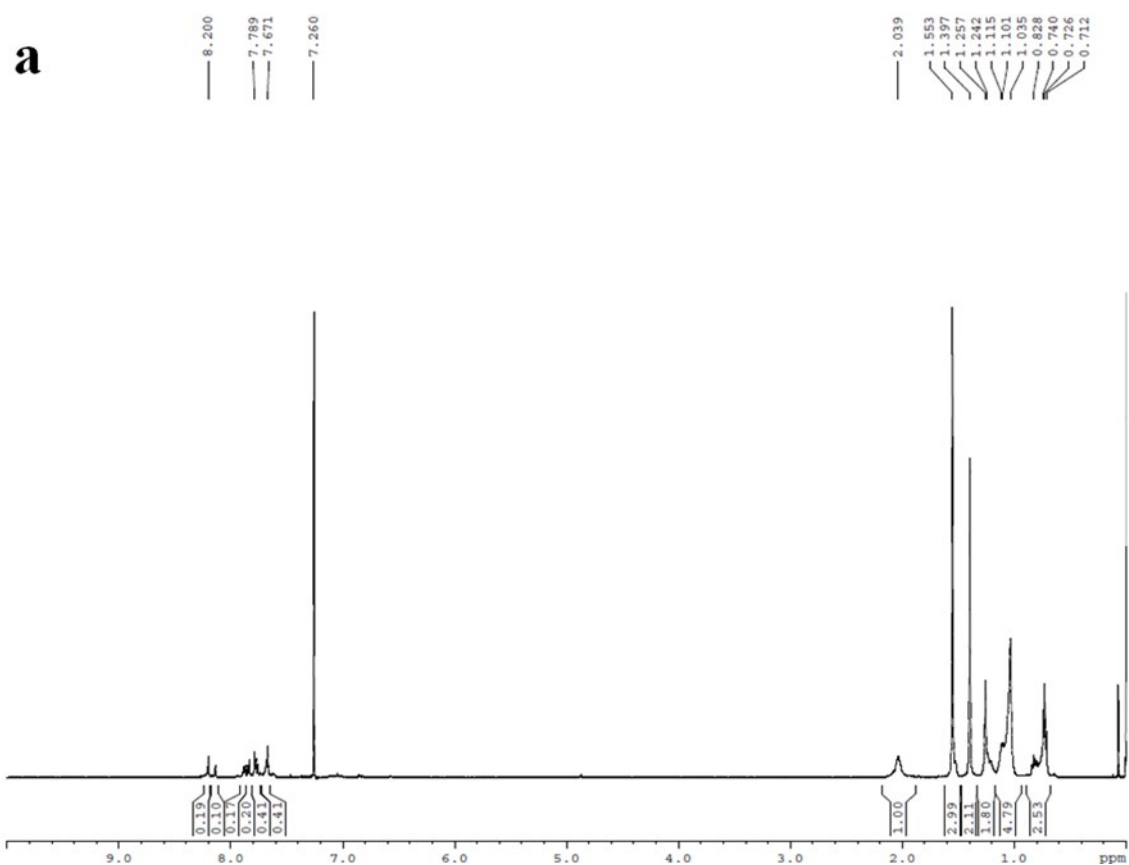

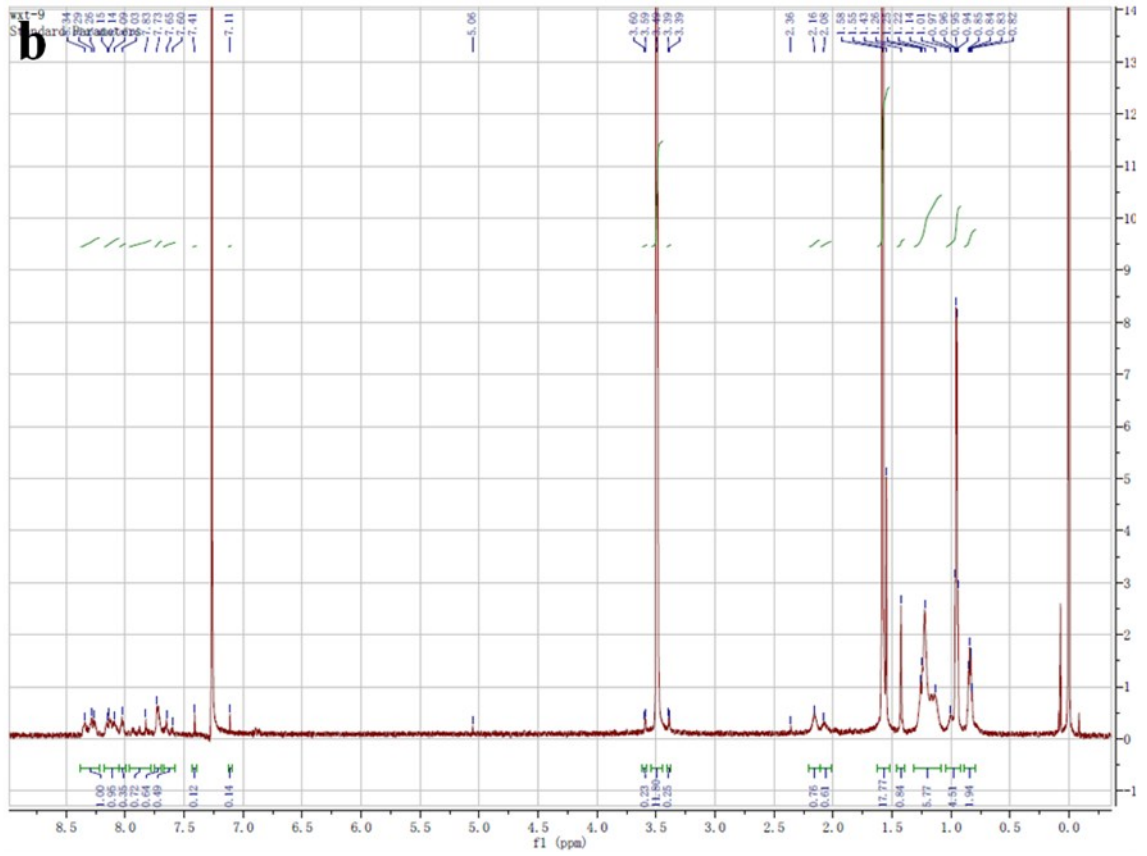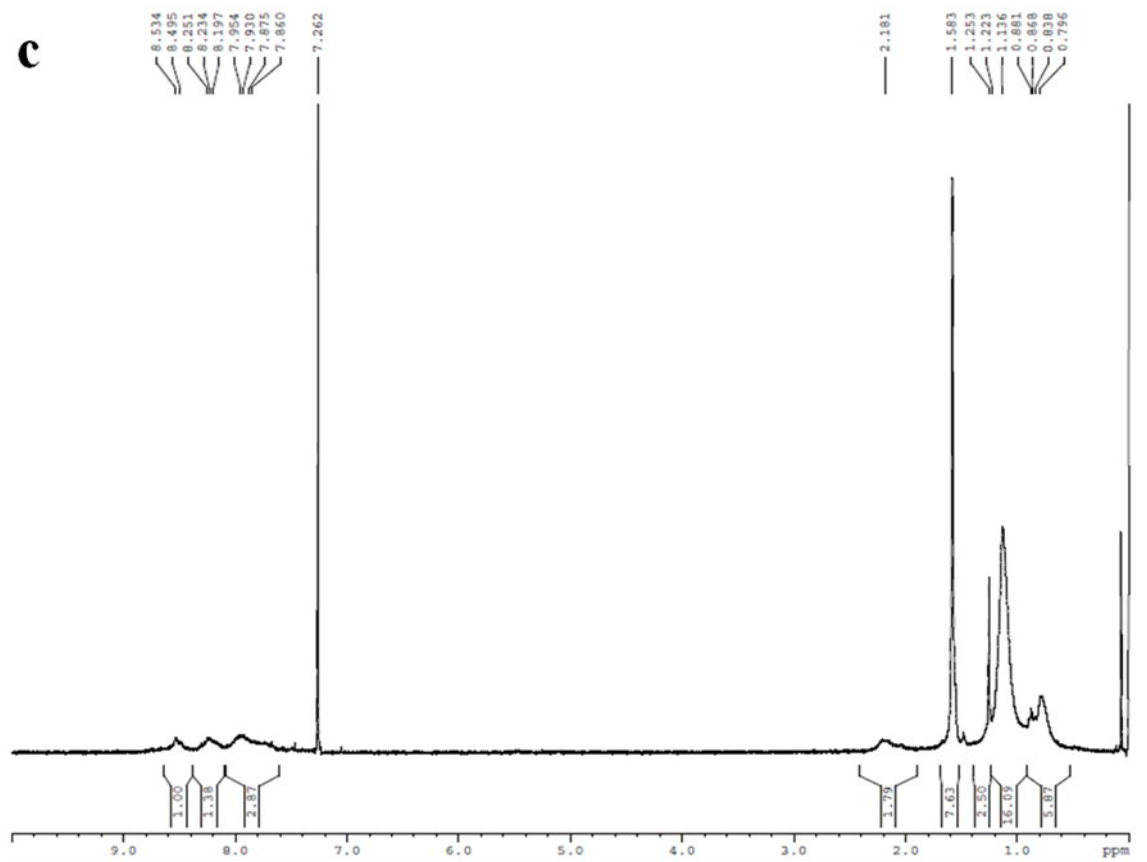

**Figure S1.** The  $^1\text{H}$ -NMR spectrum of S1 (a), S2 (b), S3 (c).

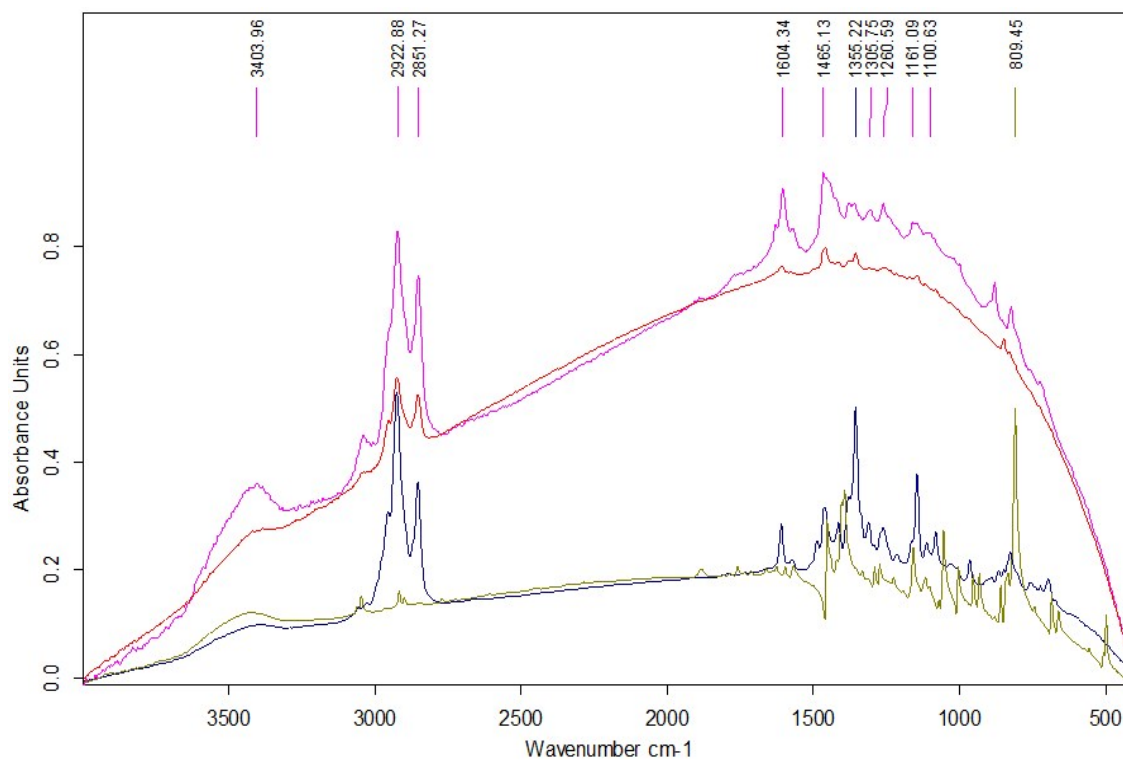

**Figure S2.** Fourier transform infrared spectra of S3, S2, S1 and the contrast (from up to down in the figure)

**Table S1.** The GPC results of S1-S3 polymer

|           | Mn (Da) | Mw (Da) | MP    | Mz (Da) | Mz+1(Da) | Polydispersity |
|-----------|---------|---------|-------|---------|----------|----------------|
| <b>S1</b> |         |         | 78641 |         |          |                |
|           | 2875    | 3514    | 2739  | 4946    | 8140     | 1.222262       |
| <b>S2</b> | 4819    | 6981    | 5171  | 10520   | 15953    | 1.448601       |
| <b>S3</b> | 8278    | 27905   | 13575 | 73388   | 126930   | 3.370933       |

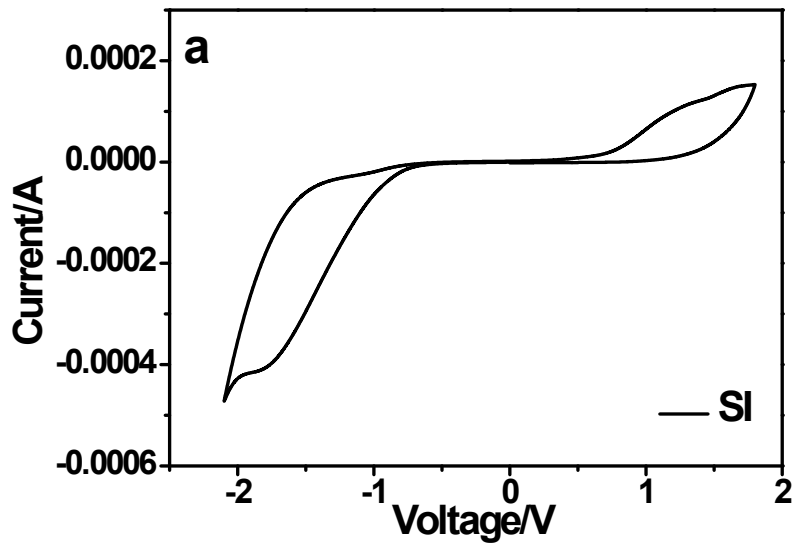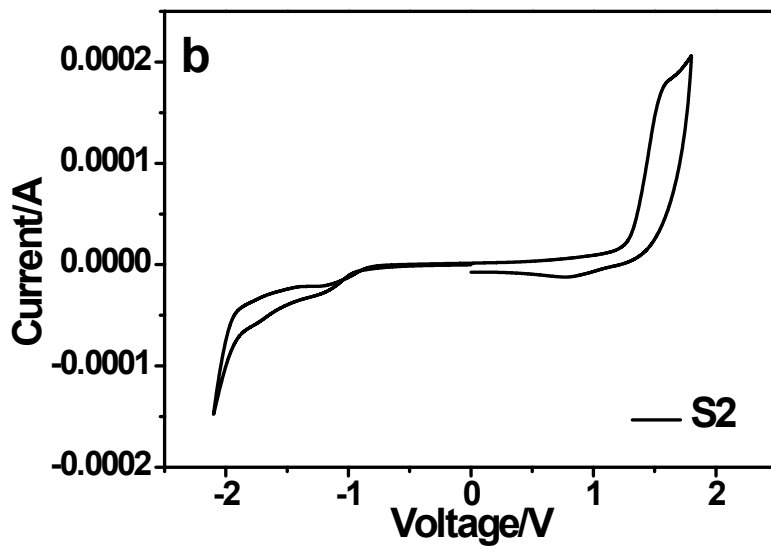

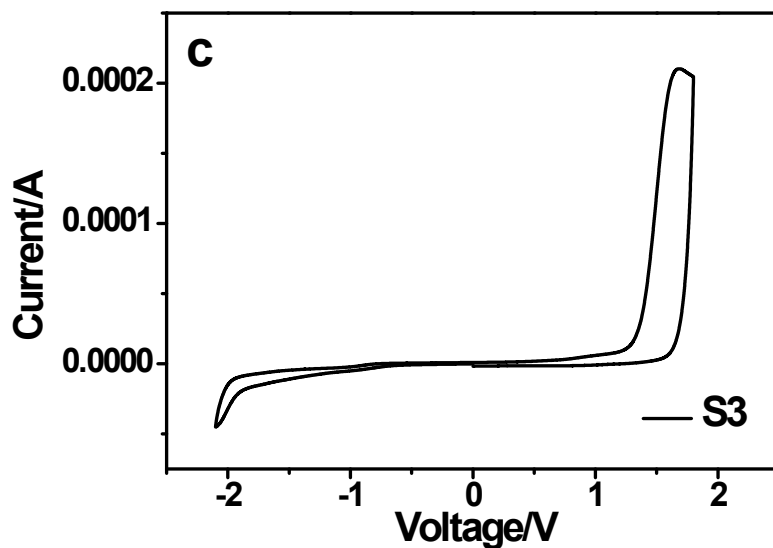

**Figure S3.** The CV curves of S1 (a), S2 (b), S3 (c) in CH<sub>3</sub>CN solution at a sweep rate of 100mV/s.

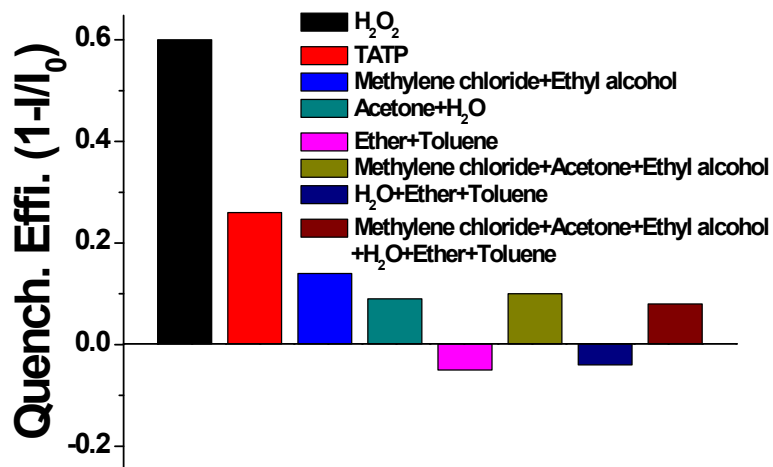

**Figure S4.** Fluorescence responses of S1 film on ZnO nanorod array to some reaction mixtures saturated vapor after an exposure of 300s.

**Table S2** The quenching efficiency (1-I/I<sub>0</sub>) of S1 film on ZnO nanorod array to different vapor pressure of H<sub>2</sub>O<sub>2</sub> after an exposure of 300s.

| Diluted Times | Vapor Pressure (ppm) | Quenching Efficiency |
|---------------|----------------------|----------------------|
| 1             | 225                  | 0.6                  |
| 5             | 37.5                 | 0.3                  |
| 10            | 18.8                 | 0.25                 |
| 90            | 1                    | 0.1                  |
